# Supplementary material for: Iroki: automatic customization and visualization of phylogenetic trees
Source: PubMed Central journal article supplement (PMC7049256; doi:10.7717/peerj.8584), 2020-02-26

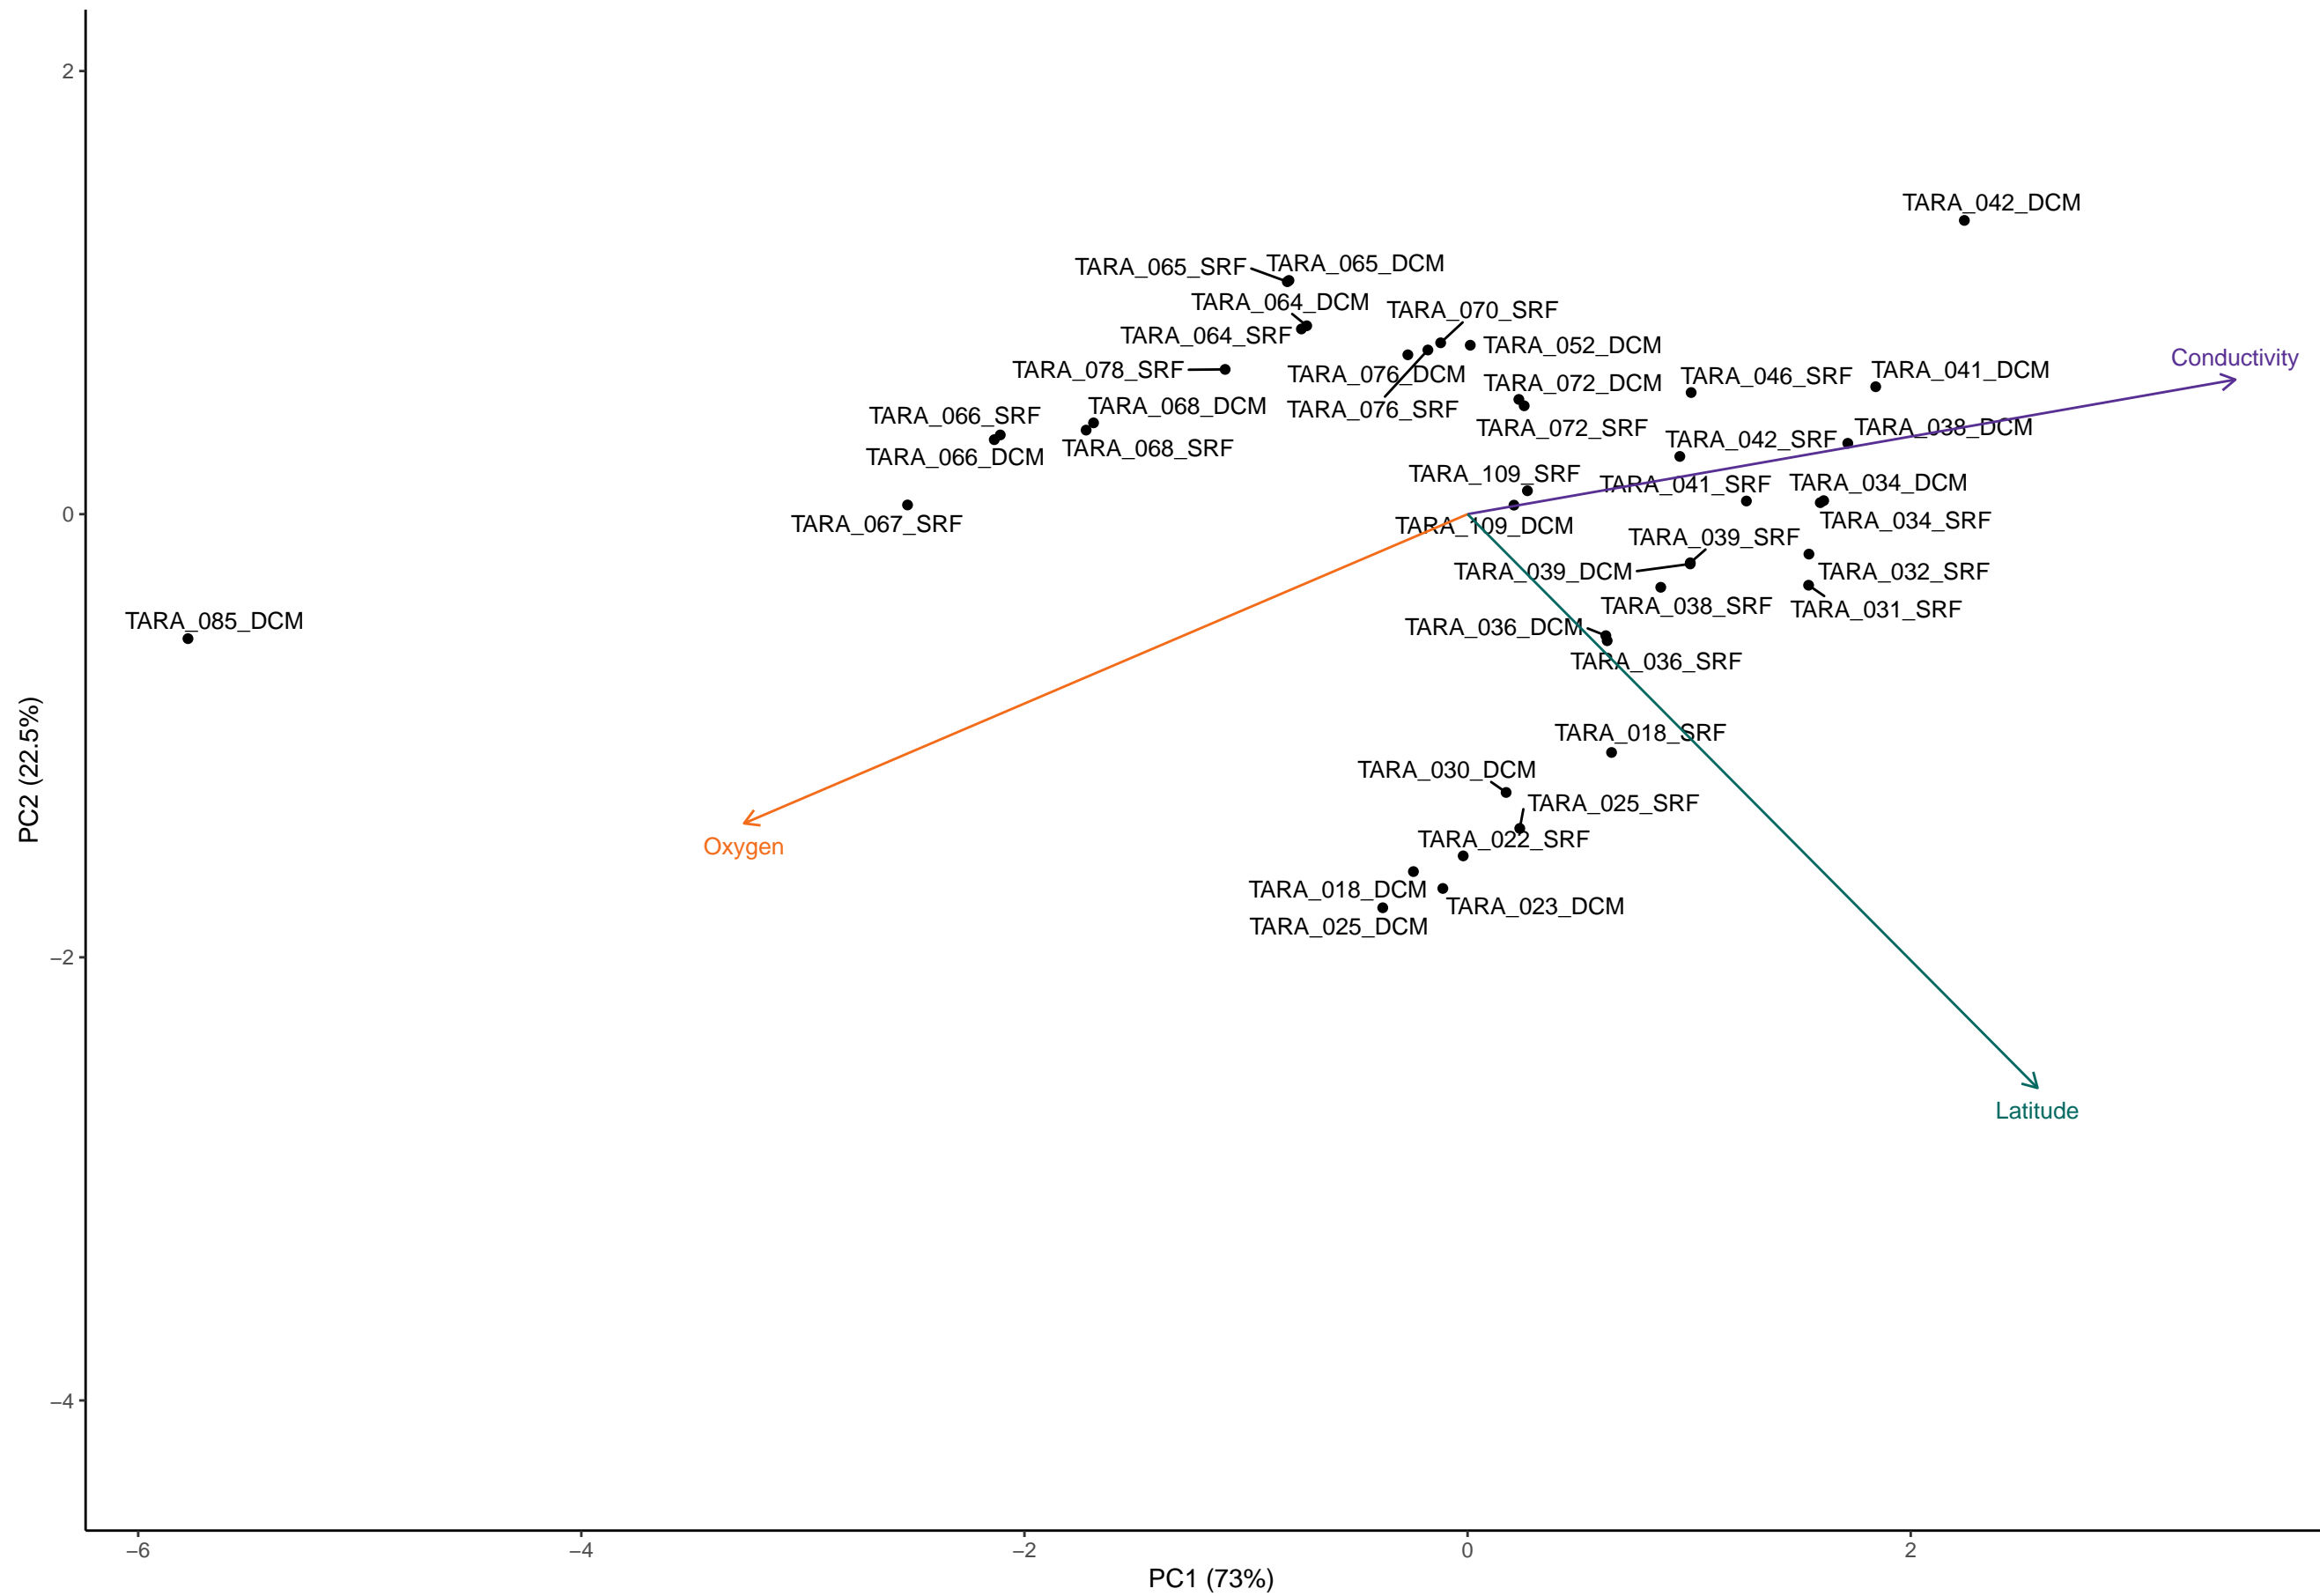

Supplement: peerj-08-8584-s002.pdf [file peerj-08-8584-s002.pdf]
